# Supplementary material for: Roles of miR-640 and Zinc Finger Protein 91 (ZFP91) in Angiopoietin-1-Induced In Vitro Angiogenesis
Source: PubMed Central journal article supplement (PMC7408170; doi:10.3390/cells9071602), 2020-07-02
Supplement: cells-09-01602-s001.pdf [file cells-09-01602-s001.pdf]

## **Supplementary Materials**

**Table S1.** Primers used for quantitative real-time PCR experiments.

| <b>Gene</b> | <b>Sequence (5'⇒3')</b>                               | <b>Accession #</b> | <b>Expected size (bp)</b> |
|-------------|-------------------------------------------------------|--------------------|---------------------------|
| β-ACTIN     | F: AGAAAATCTGGCACCCACACC<br>R: GGGGTGTTGAAGGTCTCAA    | NM_001101          | 126                       |
| Ang-1       | F: GCAGAGAGATGCTCCACACG<br>R: TATCTGGGCCATCTCCGACT    | NM_001146          | 145                       |
| BAFF        | F: GGGAGCAGTCACGCCTTAC<br>R: GATCGGACAGAGGGGCTTT      | NM_0006573         | 103                       |
| CCL19       | F: TACATCGTGAGGAACTTCCACT<br>R: CTGGATGATGCGTTCTACCCA | NM_006265          | 132                       |
| GAPDH       | F: AAGAAGGTGGTGAAGCAGGCG<br>R: ACCAGGAAATGAGCTTGACAA  | NM_023964          | 166                       |
| VEGF        | F: CTACCTCCACCATGCCAAGT<br>R: CACACAGGATGGCTTGAAGA    | NM_001025366       | 281                       |
| ZFP91       | F: CTCGCTATTTGCAGCACCCAC<br>R: GCCCGAGCACAATATTCACA   | NM_053023          | 165                       |
| Pre-miR-640 | F: TGGGCAAGTTCCTGAAGATCAGA<br>R: AGAGGCAGGTTCTGGATCAT | MIMAT0003310       |                           |
| Hsa-miR-640 | GATCCAGGAACCTGCCTCT                                   | MIMAT0003310       |                           |
| U6          | ACTAAAATTGGAACGATACAGAGA                              | NR_004394          |                           |
| 5S          | ATACCGGGTGCTGTAGGCTT                                  | D14867             |                           |

|                                                   | Predicted consequential pairing of target region (top) and miRNA (bottom)                | Site type | Context++ score |
|---------------------------------------------------|------------------------------------------------------------------------------------------|-----------|-----------------|
| Position 125-131 of ZFP91 3' UTR<br>hsa-miR-640   | 5' ...CUGCUCUUCCAUGUGGAUCAC...<br>       <br>3'                  UCUCCGUCCAGGACCUAGUA    | 7mer-m8   | -0.02           |
| Position 349-355 of ZFP91 3' UTR<br>hsa-miR-640   | 5' ...AACUCUGAUGUGCUCUGGAUCAG...<br>       <br>3'                  UCUCCGUCCAAGGACCUAGUA | 7mer-m8   | -0.04           |
| Position 3096-3103 of ZFP91 3' UTR<br>hsa-miR-640 | 5' ...AUUGAACAAAUGUAAUGGAUCAA...<br>       <br>3'                  UCUCCGUCCAAGGACCUAGUA | 8mer      | -0.41           |

|                                                   | Context++ score percentile | Weighted context++ score | Conserved branch length | P <sub>CT</sub> |
|---------------------------------------------------|----------------------------|--------------------------|-------------------------|-----------------|
| Position 125-131 of ZFP91 3' UTR<br>hsa-miR-640   | 16                         | -0.02                    | 0.054                   | N/A             |
| Position 349-355 of ZFP91 3' UTR<br>hsa-miR-640   | 44                         | -0.04                    | 0.054                   | N/A             |
| Position 3096-3103 of ZFP91 3' UTR<br>hsa-miR-640 | 98                         | -0.41                    | 0.054                   | N/A             |

**Figure S1.** Predicted miR-640 binding regions located in human ZFP91 3'UTR (derived from TargetScan Release 7.1).

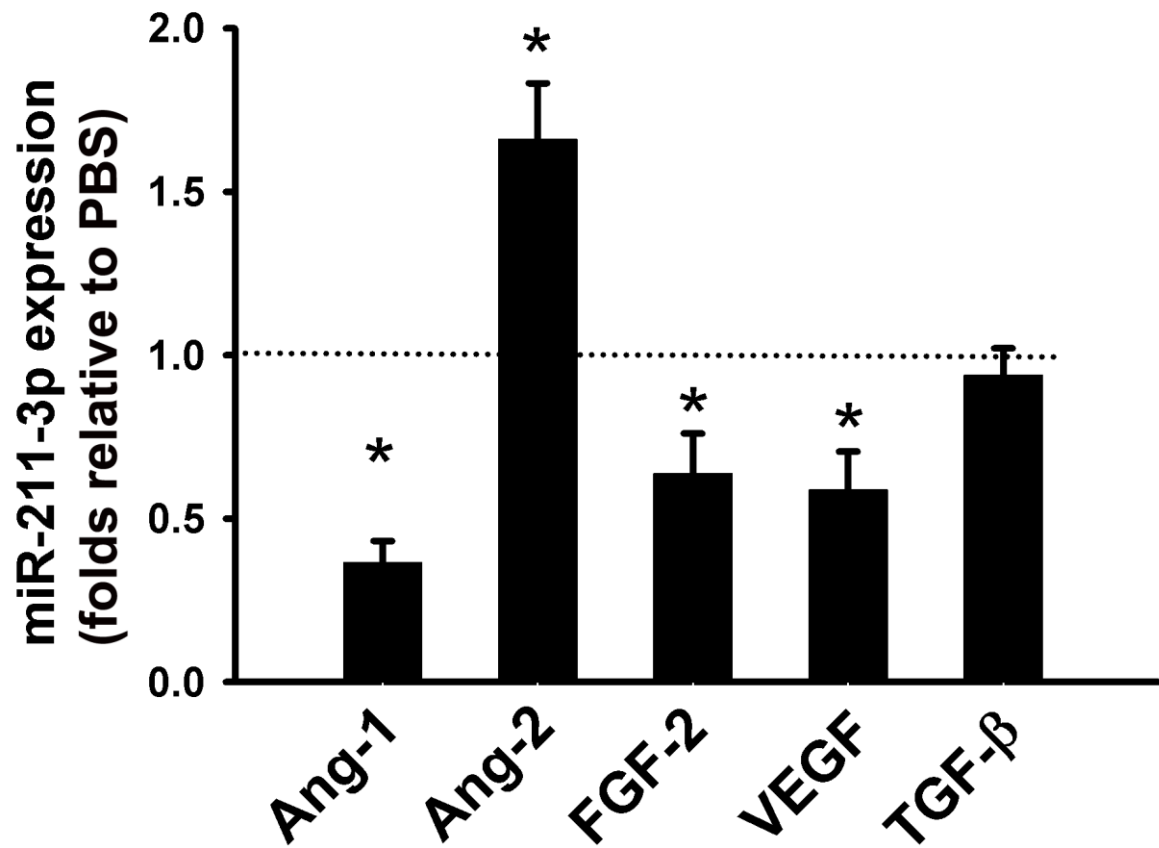

**Figure S2. Regulation of of miR-211-3p expression in ECs by angiogenesis factors.** Mature miR-211-3p expression measured in HUVECs exposed to PBS, Ang-2 (300ng/ml), FGF-2 (10ug/ml), VEGF (40ng/ml), or TGF-β (2ng/ml) for 24 h. Values are means± SEM and are expressed as folds relative to PBS. \*P < 0.05, compared with PBS.

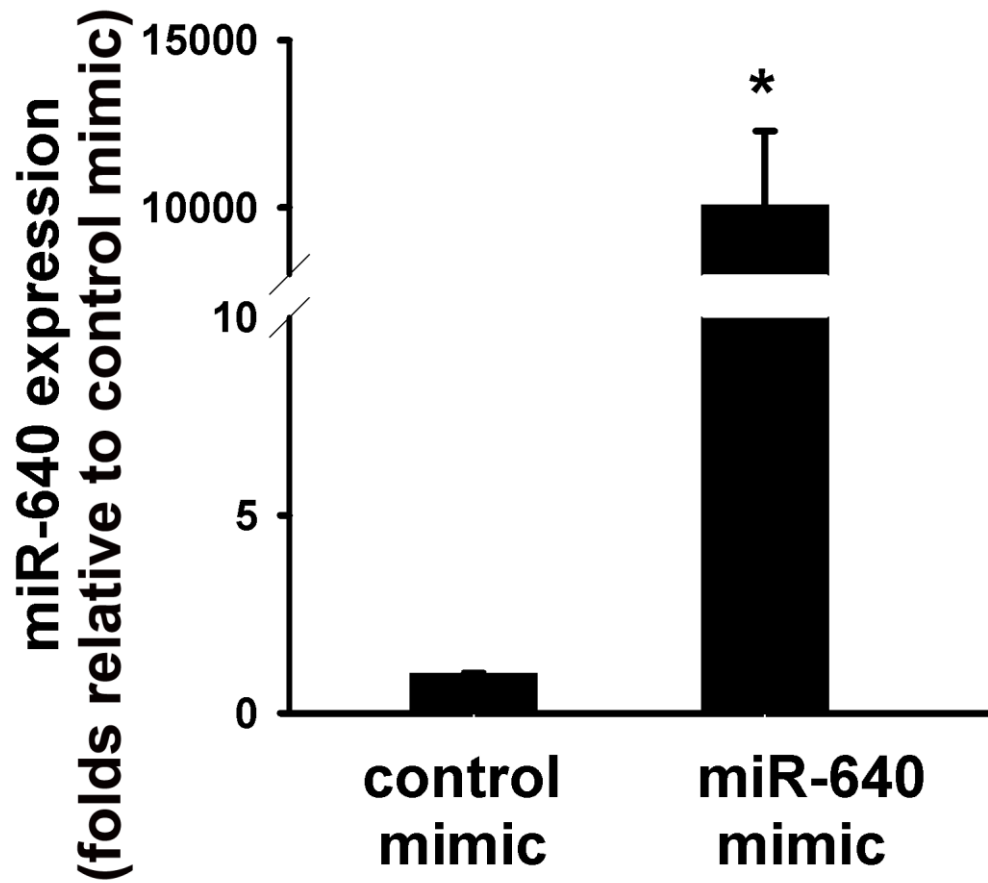

Figure S3. Transfection efficiency of miR-640 mimic in HUVECs. miR-640 levels in HUVECs transfected with control or miR640 mimic. Mean  $\pm$ SEM, \* $p$ <0.05, compared to control mimic.

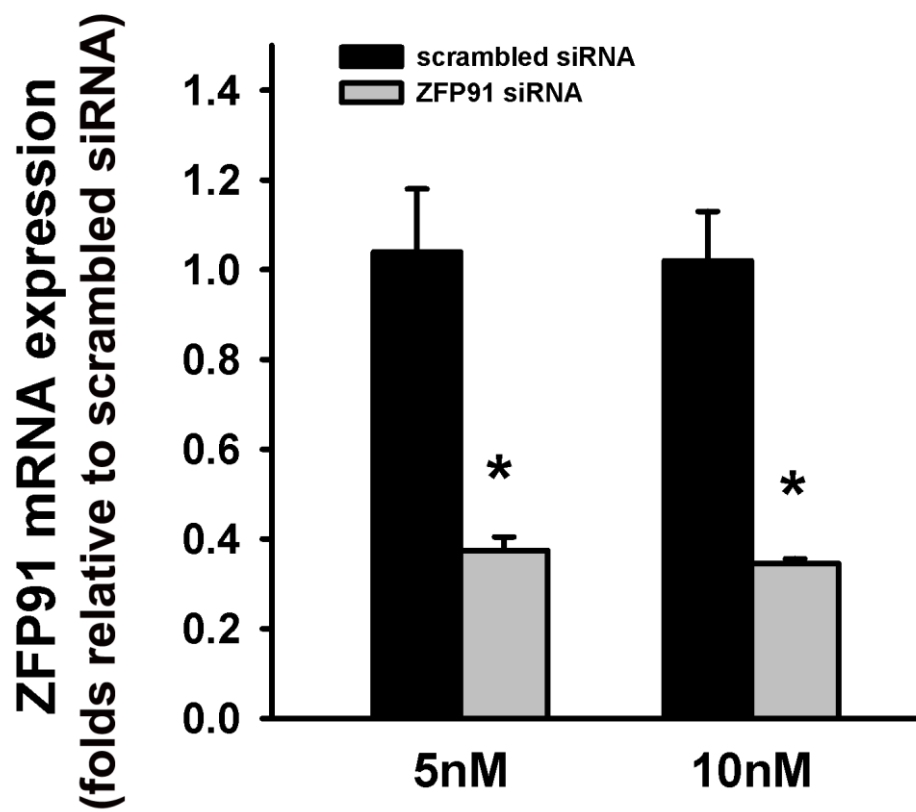

Figure S4. Verification of ZFP91 knockdown by siRNA oligos. ZFP91 mRNA expression measured in HUVECs transfected with scrambled or ZFP91 siRNA oligos. Values were measured 48 h post-transfection. \*P<0.05, compared to scrambled siRNA.
